# Supplementary material for: Exploring 2016–2017 surface ozone pollution over China: source contributions and meteorological influences
Source: Copernicus journal article supplement (doi:10.5194/acp-2019-98), 2019-03-11
Supplement: Supplementary file 1 [file acp-2019-98-supplement.pdf]

1 *Supplementary of*

2

3 **Exploring 2016-2017 surface ozone pollution in China: source contributions and**  
4 **meteorological influences**

5

6 Xiao Lu et al.

7

8 *Correspondence to:* Lin Zhang (zhanglg@pku.edu.cn) and Xiao Lu (luxiao\_atchem@pku.edu.cn)

9

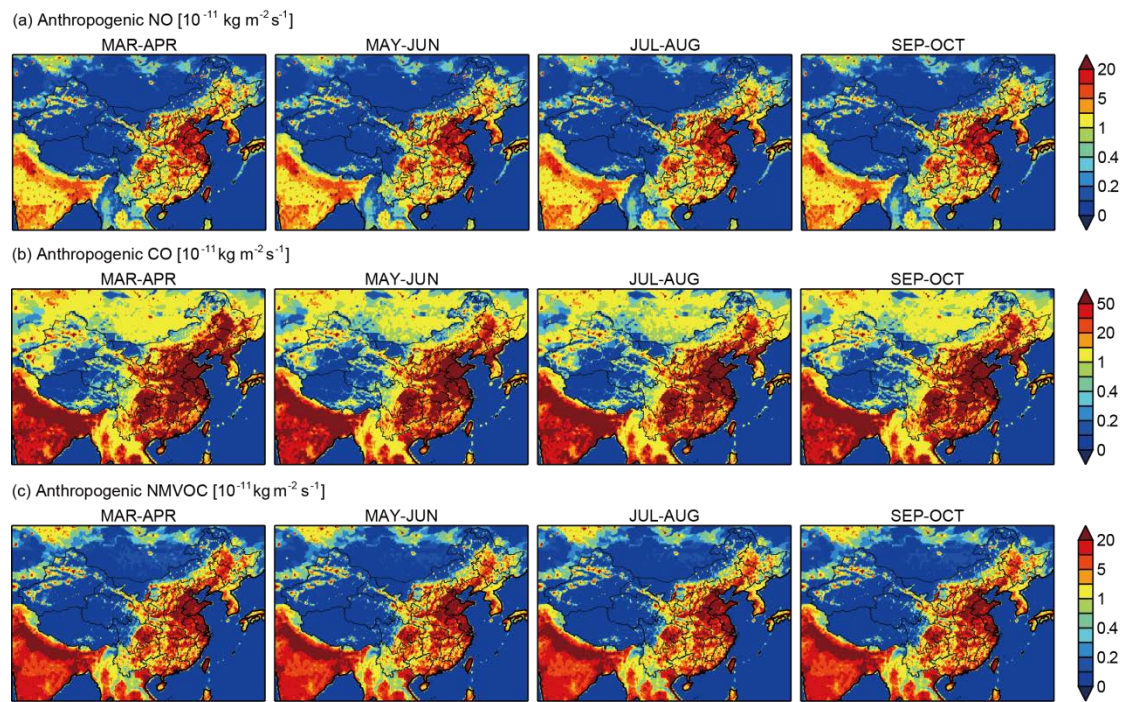

10  
11  
12  
13

**Figure S1.** Spatial distribution of bimonthly mean (a) anthropogenic NO emissions, (b) anthropogenic CO emissions, (c) anthropogenic NMVOC emissions averaged for 2016–2017.

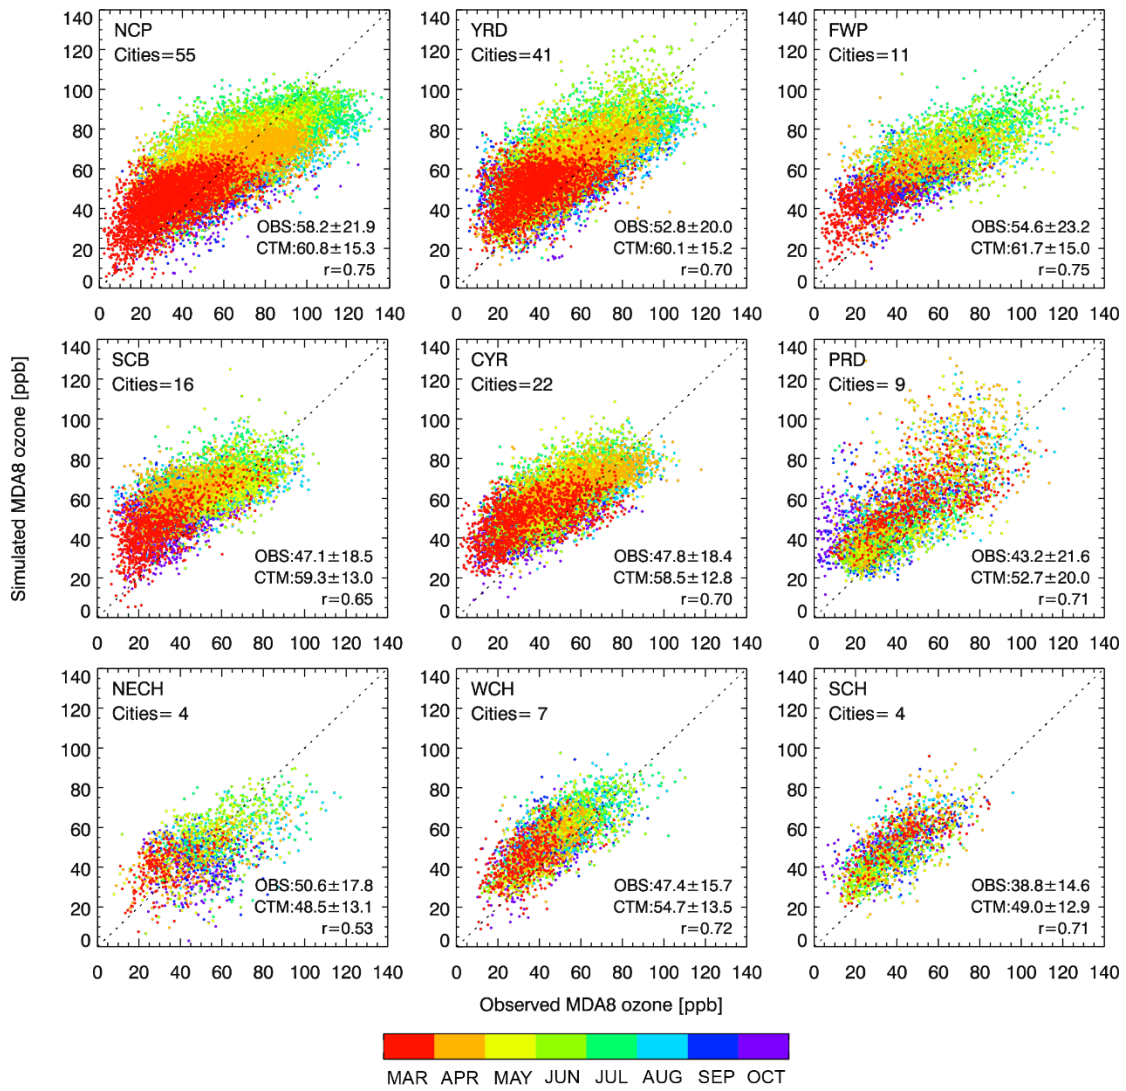

14  
15  
16  
17  
18  
19  
20

**Figure S2.** Simulated vs. observed daily maximum 8 h average (MDA8) ozone concentrations at the ensemble of the 169 cities categorized by the 9 city clusters for March-October 2016-2017. The colors denote different months. The mean concentrations, standard deviations, correlation coefficients (r), the 1:1 line, and number of cities in each city cluster are shown inset.

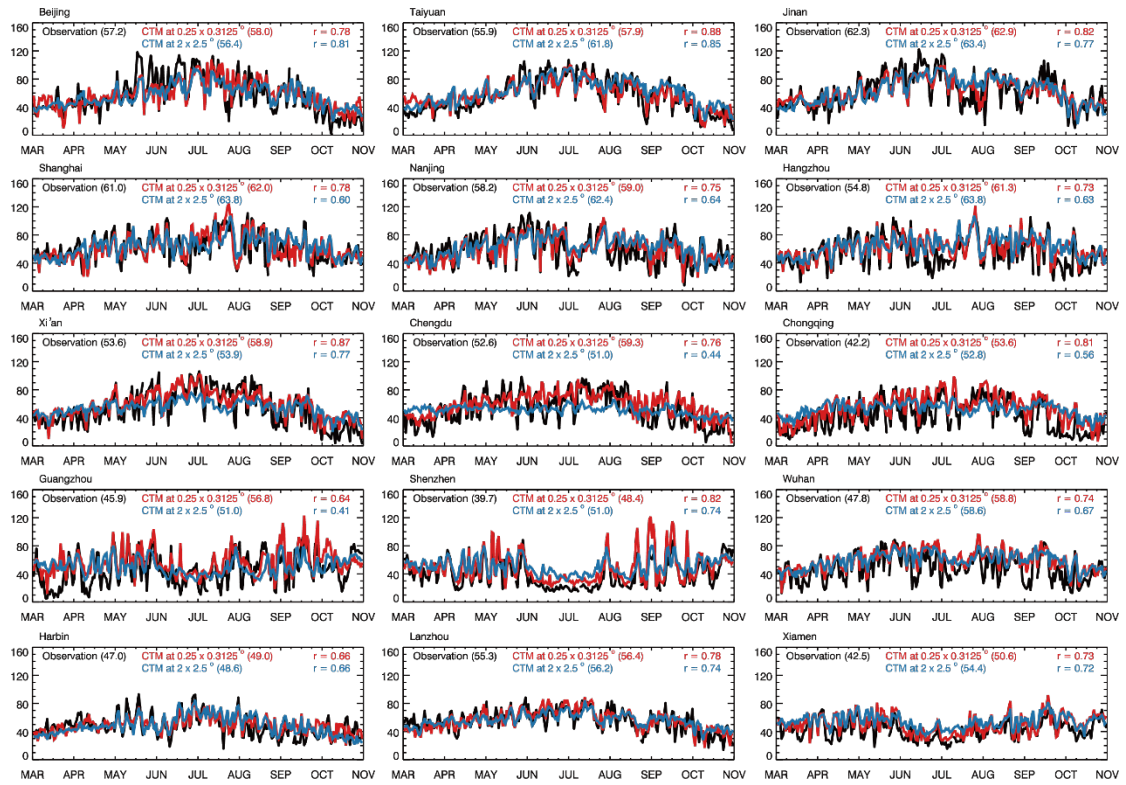

21  
22  
23  
24  
25  
26

**Figure. S3** Time series of observed and simulated daily MDA8 ozone concentrations from the nested model (red) and the global model (blue) at 15 representative cities from the nine city clusters in March-October 2017. The mean concentrations and correlation coefficients (r) are shown inset.

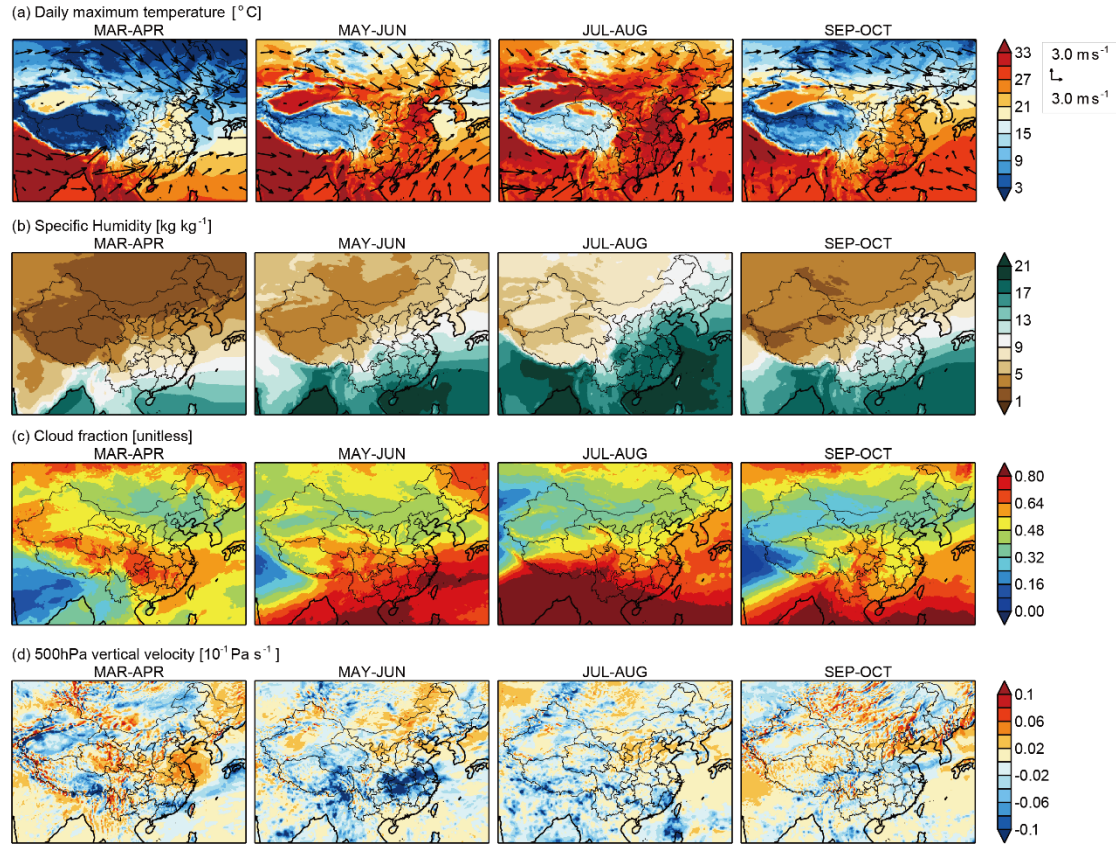

27

28 **Figure. S4** Spatial distribution of bimonthly mean (a) daily maximum 2-meter air temperature  
 29 with 850hPa horizontal wind overlaid, (b) specific humidity, (c) cloud cover fraction, and (d)  
 30 500hPa vertical velocity averaged for 2016–2017.

31

32

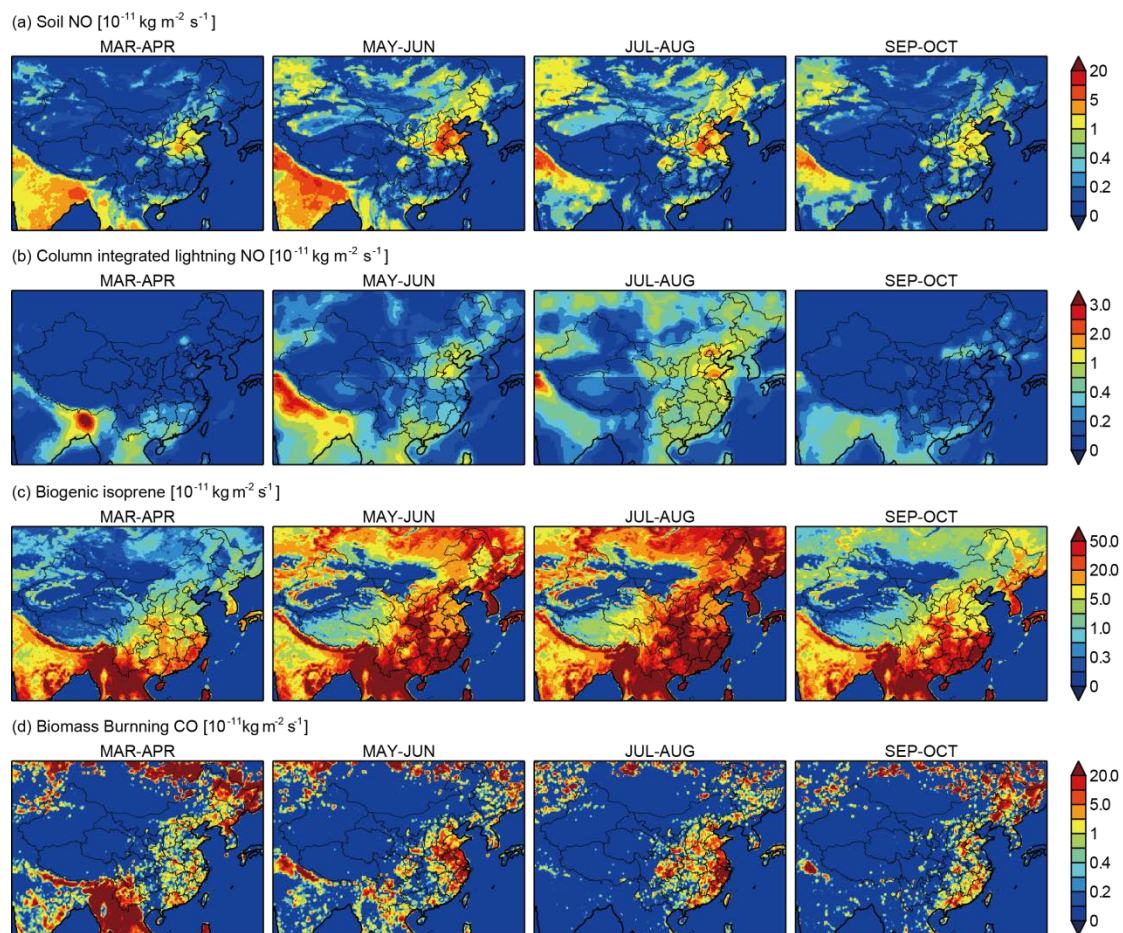

33

34 **Figure. S5** Spatial distribution of bimonthly mean (a) soil NO emissions, (b) column integrated NO  
 35 emissions, (c) biogenic isoprene emissions averaged for 2016–2017, and (d) biomass burning CO  
 36 emission in 2014 used in the model.

37

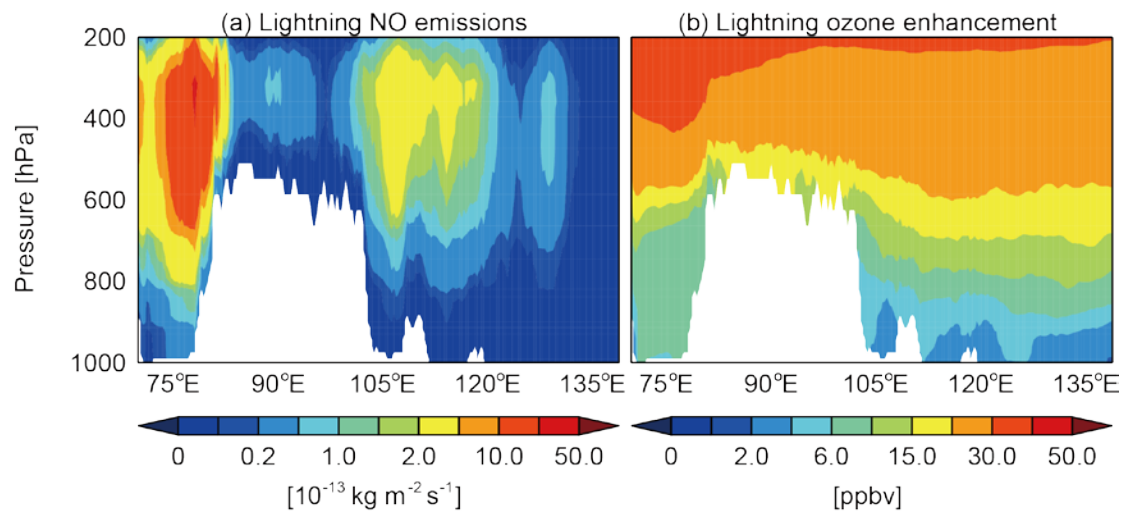

39

40 **Figure S6.** Zonal-vertical distribution of (a) lightning NO emissions and (b) lightning ozone

41 enhancement at 30°N.

42

43

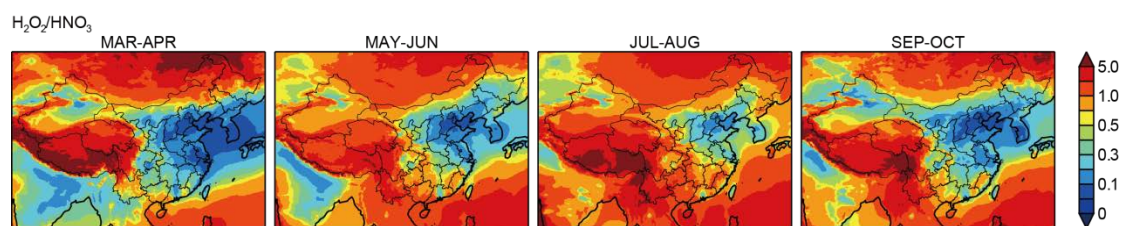

44

45 **Figure S7.** Spatial distribution of bimonthly mean  $\text{H}_2\text{O}_2/\text{HNO}_3$  concentration ratios (an indicator of  
46 ozone chemical production regime) at the surface averaged for 2016–2017. Areas with  $\text{H}_2\text{O}_2/\text{HNO}_3$   
47 values lower than 0.3 can be considered as the VOC-limited regime, while values higher than 0.6  
48 can be considered as  $\text{NO}_x$ -limited.

49

50



51

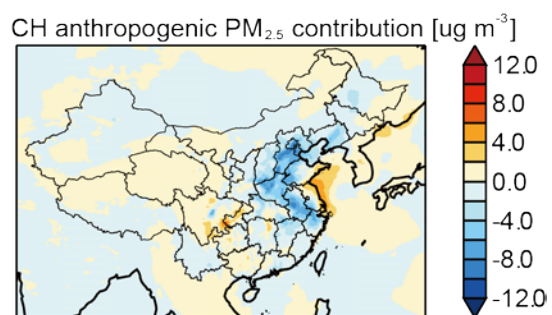

52

53 **Figure S8.** Differences in May-August mean domestic anthropogenic PM<sub>2.5</sub> contribution between  
54 2017 and 2016 in unit of [ $\mu\text{g m}^{-3}$ ].

55

56

57

Daily maximum temperature  
(2016-2017 minus 2013-2015)

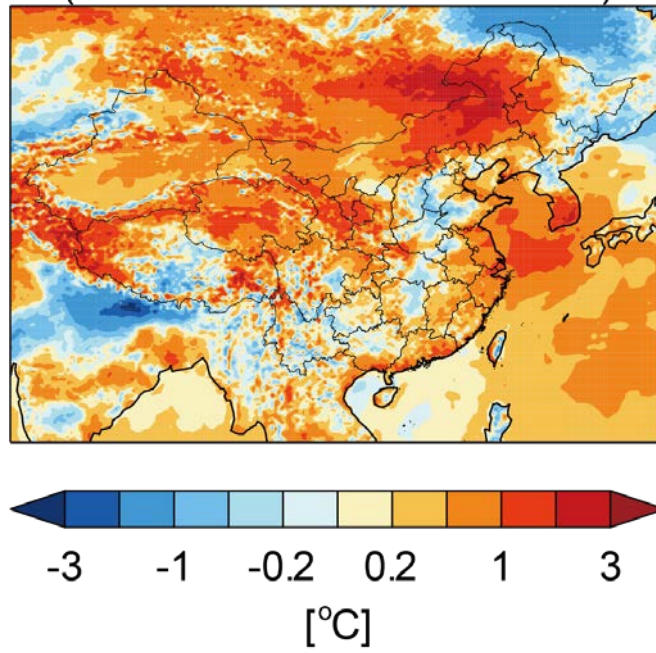

58  
59  
60  
61

**Figure S9.** Differences in May-August mean daily maximum 2-m air temperature between 2016-2017 period and 2013-2015 period.
